# Supplementary material for: Omega-3-Acid Ethyl Esters Block the Protumorigenic Effects of Obesity in Mouse Models of Postmenopausal Basal-like and Claudin-Low Breast Cancer
Source: Oxford University Press journal article supplement (doi:10.1158/1940-6207.capr-15-0018), 2015-06-22
Supplement: 19406207capr150018-sup-144112_1_art_file_2970940_n615hs.docx [file 19406207capr150018-sup-144112_1_art_file_2970940_n615hs.docx]

**Supplemental Figure 1.** EPA+DHA supplementation does not significantly alter serum levels of A. TNF-a; B. MCP-1; C. Insulin; D. IGF-1; or E. IGF-BP3 in control or DIO mice (n=10 per group). Data shown are means ± SEM, statistically significant (P<0.05) differences are indicated by different letters.
